# Supplementary material for: Association of Serum Oxysterols with Cholesterol Metabolism Markers and Clinical Factors in Patients with Coronary Artery Disease: A Covariance Structure Analysis
Source: MDPI journal article supplement (doi:10.3390/nu15132997), 2023-06-30
Supplement: s1 [file s1]

**Supplementary Table S1. Result of the path model 1.**

| Clinical factor        |   |              | Estimate | Standard | Statistic | P value | Standardize |
|------------------------|---|--------------|----------|----------|-----------|---------|-------------|
|                        |   |              | d value  | error    | value     |         | d estimates |
| Cholesterol absorption | ← | Age          | -0.019   | 0.081    | -0.235    | 0.815   | -0.018      |
|                        | ← | Male         | -0.012   | 0.193    | -0.061    | 0.951   | -0.005      |
|                        | ← | Hypertension | -0.202   | 0.169    | -1.192    | 0.233   | -0.088      |
|                        | ← | Diabetes     | -0.023   | 0.152    | -0.153    | 0.879   | -0.011      |
|                        | ← | Dyslipidemia | 0.554    | 0.252    | 2.197     | 0.028   | 0.163       |
|                        | ← | Smoking      | -0.033   | 0.173    | -0.188    | 0.851   | -0.014      |
|                        | ← | Statin usage | 0.379    | 0.159    | 2.379     | 0.017   | 0.175       |
|                        | ← | hs-CRP       | -0.123   | 0.079    | -1.565    | 0.118   | -0.129      |
| Cholesterol synthesis  | ← | Age          | -0.128   | 0.082    | -1.560    | 0.119   | -0.117      |
|                        | ← | Male         | -0.239   | 0.195    | 1.222     | 0.222   | 0.091       |
|                        | ← | Hypertension | -0.286   | 0.171    | -1.671    | 0.095   | -0.12       |
|                        | ← | Diabetes     | -0.137   | 0.154    | -0.887    | 0.375   | -0.063      |
|                        | ← | Dyslipidemia | 0.288    | 0.253    | 1.139     | 0.255   | 0.082       |
|                        | ← | Smoking      | -0.137   | 0.175    | -0.784    | 0.433   | -0.058      |
|                        | ← | Statin usage | 0.588    | 0.162    | 3.626     | <0.001  | 0.261       |
|                        | ← | hs-CRP       | -0.113   | 0.079    | -1.428    | 0.153   | -0.114      |
| Campesterol TRIOL      | ← | Cholesterol  | 0.113    | 0.030    | 3.726     | <0.001  | 0.273       |
|                        | ← | absorption   | 0.4      | 0.054    | 7.398     | <0.001  | 0.542       |
|                        | ← |              | 0.566    | 0.051    | 11.034    | <0.001  | 0.958       |
|                        | ← |              | 0.12     | 0.051    | 2.336     | 0.019   | 0.153       |
|                        | ← |              | 0.294    | 0.053    | 5.589     | <0.001  | 0.355       |
|                        | ← |              | 0.124    | 0.039    | 3.159     | 0.002   | 0.196       |
|                        | ← |              | 0.208    | 0.045    | 4.615     | <0.001  | 0.277       |
|                        | ← |              | 0.053    | 0.043    | 1.238     | 0.216   | 0.07        |
|                        | ← |              | -0.019   | 0.014    | -1.383    | 0.167   | -0.099      |
| Campesterol 24-OH-C    | ← | Cholesterol  | 0.005    | 0.029    | 0.187     | 0.852   | 0.013       |
|                        | ← | synthesis    | 0.459    | 0.049    | 9.447     | <0.001  | 0.609       |
|                        | ← |              | 0.529    | 0.046    | 11.421    | <0.001  | 0.665       |
|                        | ← |              | 0.071    | 0.022    | 3.28      | 0.001   | 0.236       |
|                        | ← |              | 0.436    | 0.036    | 11.948    | <0.001  | 0.72        |
|                        | ← |              | 0.561    | 0.041    | 13.733    | <0.001  | 0.775       |
|                        | ← |              | 0.658    | 0.041    | 15.984    | <0.001  | 0.897       |
|                        | ← |              | 0.443    | 0.042    | 10.579    | <0.001  | 0.678       |
|                        | ← |              | 0.058    | 0.013    | 4.347     | <0.001  | 0.312       |
| Age                    | ↔ | Male         | -0.131   | 0.03     | -4.346    | <0.001  | -0.318      |
|                        | ↔ | Hypertension | 0.08     | 0.032    | 2.476     | 0.013   | 0.175       |
|                        | ↔ | Diabetes     | -0.004   | 0.035    | -0.124    | 0.902   | -0.009      |

|              |   |              |        |       |        |        |        |
|--------------|---|--------------|--------|-------|--------|--------|--------|
|              | ↔ | Dyslipidemia | 0.0001 | 0.021 | 0.019  | 0.985  | 0.001  |
|              | ↔ | Smoking      | -0.149 | 0.034 | -4.416 | <0.001 | -0.323 |
|              | ↔ | Statin usage | -0.011 | 0.034 | -0.34  | 0.734  | -0.024 |
|              | ↔ | hs-CRP       | 0.058  | 0.084 | 0.691  | 0.489  | 0.053  |
| Male         | ↔ | Hypertension | -0.021 | 0.013 | -1.562 | 0.118  | -0.109 |
|              | ↔ | Diabetes     | 0.005  | 0.014 | 0.366  | 0.714  | 0.026  |
|              | ↔ | Dyslipidemia | -0.018 | 0.009 | -2.042 | 0.041  | -0.144 |
|              | ↔ | Smoking      | 0.048  | 0.014 | 3.497  | <0.001 | 0.251  |
|              | ↔ | Statin usage | 0.011  | 0.014 | 0.785  | 0.432  | 0.055  |
|              | ↔ | hs-CRP       | -0.053 | 0.035 | -1.505 | 0.132  | -0.116 |
| Hypertension | ↔ | Diabetes     | 0.046  | 0.016 | 2.862  | 0.004  | 0.204  |
|              | ↔ | Dyslipidemia | 0.017  | 0.01  | 1.723  | 0.085  | 0.121  |
|              | ↔ | Smoking      | -0.02  | 0.015 | -1.356 | 0.175  | -0.095 |
|              | ↔ | Statin usage | -0.013 | 0.015 | -0.845 | 0.398  | -0.059 |
|              | ↔ | hs-CRP       | 0.06   | 0.039 | 1.549  | 0.121  | 0.12   |
| Diabetes     | ↔ | Dyslipidemia | 0.006  | 0.011 | 0.59   | 0.555  | 0.041  |
|              | ↔ | Smoking      | 0.019  | 0.016 | 1.201  | 0.23   | 0.084  |
|              | ↔ | Statin usage | 0.02   | 0.017 | 1.17   | 0.242  | 0.082  |
|              | ↔ | hs-CRP       | 0.075  | 0.042 | 1.759  | 0.078  | 0.136  |
| Dyslipidemia | ↔ | Smoking      | 0.014  | 0.01  | 1.358  | 0.175  | 0.095  |
|              | ↔ | Statin usage | 0.009  | 0.01  | 0.844  | 0.399  | 0.059  |
|              | ↔ | hs-CRP       | 0.064  | 0.026 | 2.417  | 0.016  | 0.188  |
| Smoking      | ↔ | Statin usage | 0.028  | 0.016 | 1.788  | 0.074  | 0.126  |
|              | ↔ | hs-CRP       | 0.03   | 0.039 | 0.763  | 0.445  | 0.059  |

hs-CRP=high sensitivity C-reactive protein, TRIOL=cholestan-3 $\beta$ ,5 $\alpha$ ,6 $\beta$ -triol, 4 $\beta$ -OH-C=4 $\beta$ -hydroxy-cholesterol, 24-OH-C=24-hydroxy-cholesterol 7-keto-C=7-keto-cholesterol,  $\beta$ -epoxy-C= $\beta$ -epoxy-cholesterol.

**Supplementary Table S2. Result of the path model 2.**

| Clinical factor        |                |  | Estimate | Standard | Statistic | P value | Standardize |
|------------------------|----------------|--|----------|----------|-----------|---------|-------------|
|                        |                |  | d value  | error    | value     |         | d estimates |
| Cholesterol absorption | ← Age          |  | -0.078   | 0.079    | -0.989    | 0.323   | -0.074      |
|                        | ← BMI          |  | -0.026   | 0.021    | -1.238    | 0.216   | -0.088      |
|                        | ← Hypertension |  | -0.166   | 0.167    | -0.993    | 0.321   | -0.072      |
|                        | ← Diabetes     |  | -0.021   | 0.147    | -0.143    | 0.886   | -0.01       |
|                        | ← Dyslipidemia |  | 0.569    | 0.24     | 2.367     | 0.018   | 0.167       |
|                        | ← ACS          |  | 0.026    | 0.159    | 0.161     | 0.872   | 0.012       |
|                        | ← Statin usage |  | 0.362    | 0.151    | 2.399     | 0.016   | 0.167       |
|                        | ← BNP          |  | 0.128    | 0.069    | 1.854     | 0.064   | 0.149       |
| Cholesterol synthesis  | ← Age          |  | -0.112   | 0.082    | -1.355    | 0.175   | -0.103      |
|                        | ← BMI          |  | 0.021    | 0.022    | 0.939     | 0.348   | 0.068       |
|                        | ← Hypertension |  | -0.317   | 0.175    | -1.809    | 0.07    | -0.134      |
|                        | ← Diabetes     |  | -0.173   | 0.155    | -1.122    | 0.262   | -0.08       |
|                        | ← Dyslipidemia |  | 0.104    | 0.248    | 0.417     | 0.677   | 0.03        |
|                        | ← ACS          |  | 0.103    | 0.166    | 0.621     | 0.534   | 0.047       |
|                        | ← Statin usage |  | 0.632    | 0.159    | 3.963     | <.001   | 0.283       |
|                        | ← BNP          |  | -0.036   | 0.072    | -0.506    | 0.613   | -0.041      |
| Campesterol            | ← Cholesterol  |  | 0.109    | 0.029    | 3.710     | <.001   | 0.525       |
| TRIOL                  | ← absorption   |  | 0.387    | 0.053    | 7.257     | <.001   | 0.263       |
| 4 $\beta$ -OHC         | ←              |  | 0.588    | 0.053    | 11.162    | <.001   | 0.996       |
| 24-OH-C                | ←              |  | 0.12     | 0.049    | 2.421     | 0.015   | 0.154       |
| 25-OH-C                | ←              |  | 0.283    | 0.051    | 5.522     | <.001   | 0.345       |
| 7 $\alpha$ -OH-C       | ←              |  | 0.117    | 0.038    | 3.104     | 0.002   | 0.187       |
| 7 $\beta$ -OH-C        | ←              |  | 0.204    | 0.044    | 4.627     | <.001   | 0.272       |
| 7-keto-C               | ←              |  | 0.052    | 0.042    | 1.263     | 0.207   | 0.069       |
| Lathosterol            | ←              |  | -0.018   | 0.013    | -1.364    | 0.172   | -0.094      |
| Campesterol            | ← Cholesterol  |  | 0.008    | 0.029    | 0.288     | 0.774   | 0.02        |
| 24-OH-C                | ← synthesis    |  | 0.463    | 0.049    | 9.514     | <.001   | 0.611       |
| 25-OH-C                | ←              |  | 0.54     | 0.046    | 11.64     | <.001   | 0.676       |
| 27-OH-C                | ←              |  | 0.071    | 0.022    | 3.259     | 0.001   | 0.234       |
| 7 $\alpha$ -OH-C       | ←              |  | 0.444    | 0.037    | 12.141    | <.001   | 0.73        |
| 7 $\beta$ -OH-C        | ←              |  | 0.569    | 0.041    | 13.945    | <.001   | 0.784       |
| 7-keto-C               | ←              |  | 0.662    | 0.041    | 16.038    | <.001   | 0.897       |
| $\beta$ -EPOX          | ←              |  | 0.443    | 0.042    | 10.51     | <.001   | 0.672       |

|              |   |              |        |       |        |       |        |
|--------------|---|--------------|--------|-------|--------|-------|--------|
| Lathosterol  | ← |              | 0.059  | 0.013 | 4.354  | <.001 | 0.31   |
| Age          | ↔ | BMI          | -0.475 | 0.245 | -1.943 | 0.052 | -0.137 |
|              | ↔ | Hypertension | 0.08   | 0.032 | 2.476  | 0.013 | 0.175  |
|              | ↔ | Diabetes     | -0.004 | 0.035 | -0.124 | 0.902 | -0.009 |
|              | ↔ | Dyslipidemia | 0.0001 | 0.021 | 0.019  | 0.985 | 0.001  |
|              | ↔ | ACS          | -0.068 | 0.034 | -2.011 | 0.044 | -0.142 |
|              | ↔ | Statin usage | -0.011 | 0.034 | -0.34  | 0.734 | 0.024  |
|              | ↔ | BNP          | 0.386  | 0.093 | 4.14   | <.001 | 0.317  |
| BMI          | ↔ | Hypertension | 0.323  | 0.113 | 2.855  | 0.004 | 0.203  |
|              | ↔ | Diabetes     | 0.247  | 0.123 | 2.012  | 0.44  | 0.142  |
|              | ↔ | Dyslipidemia | 0.18   | 0.076 | 2.364  | 0.018 | 0.167  |
|              | ↔ | ACS          | -0.124 | 0.118 | -1.044 | 0.297 | -0.073 |
|              | ↔ | Statin usage | -0.094 | 0.118 | -0.795 | 0.427 | -0.055 |
|              | ↔ | BNP          | -0.548 | 0.316 | -1.738 | 0.082 | -0.128 |
| Hypertension | ↔ | Diabetes     | 0.046  | 0.016 | 2.862  | 0.004 | 0.204  |
|              | ↔ | Dyslipidemia | 0.017  | 0.01  | 1.723  | 0.085 | 0.121  |
|              | ↔ | ACS          | -0.047 | 0.016 | -2.977 | 0.003 | -0.212 |
|              | ↔ | Statin usage | -0.013 | 0.015 | -0.845 | 0.398 | -0.059 |
|              | ↔ | BNP          | 0.028  | 0.041 | 0.679  | 0.497 | 0.05   |
| Diabetes     | ↔ | Dyslipidemia | 0.006  | 0.011 | 0.59   | 0.555 | 0.041  |
|              | ↔ | ACS          | -0.048 | 0.017 | -2.81  | 0.005 | -0.2   |
|              | ↔ | Statin usage | 0.02   | 0.017 | 1.17   | 0.242 | 0.082  |
|              | ↔ | BNP          | -0.02  | 0.045 | -0.453 | 0.65  | -0.033 |
| Dyslipidemia | ↔ | ACS          | -0.008 | 0.01  | -0.742 | 0.458 | -0.052 |
|              | ↔ | Statin usage | 0.009  | 0.01  | 0.844  | 0.399 | 0.059  |
|              | ↔ | BNP          | -0.054 | 0.028 | -1.932 | 0.053 | -0.143 |
| ACS          | ↔ | Statin usage | 0.021  | 0.016 | 1.29   | 0.197 | 0.09   |
|              | ↔ | BNP          | 0.129  | 0.045 | 2.904  | 0.004 | 0.218  |

ACS=Acute coronary syndrome, BNP=brain natriuretic peptide , TRIOL=cholestan-3 $\beta$ ,5 $\alpha$ ,6 $\beta$ -triol, 4 $\beta$ -OH-C=4 $\beta$ -hydroxy-cholesterol, 24-OH-C=24-hydroxy-cholesterol 7-keto-C=7-keto-cholesterol,  $\beta$ -epoxy-C= $\beta$ -epoxy-cholesterol.

Supplementary Figure S1. Proposed Path model 2

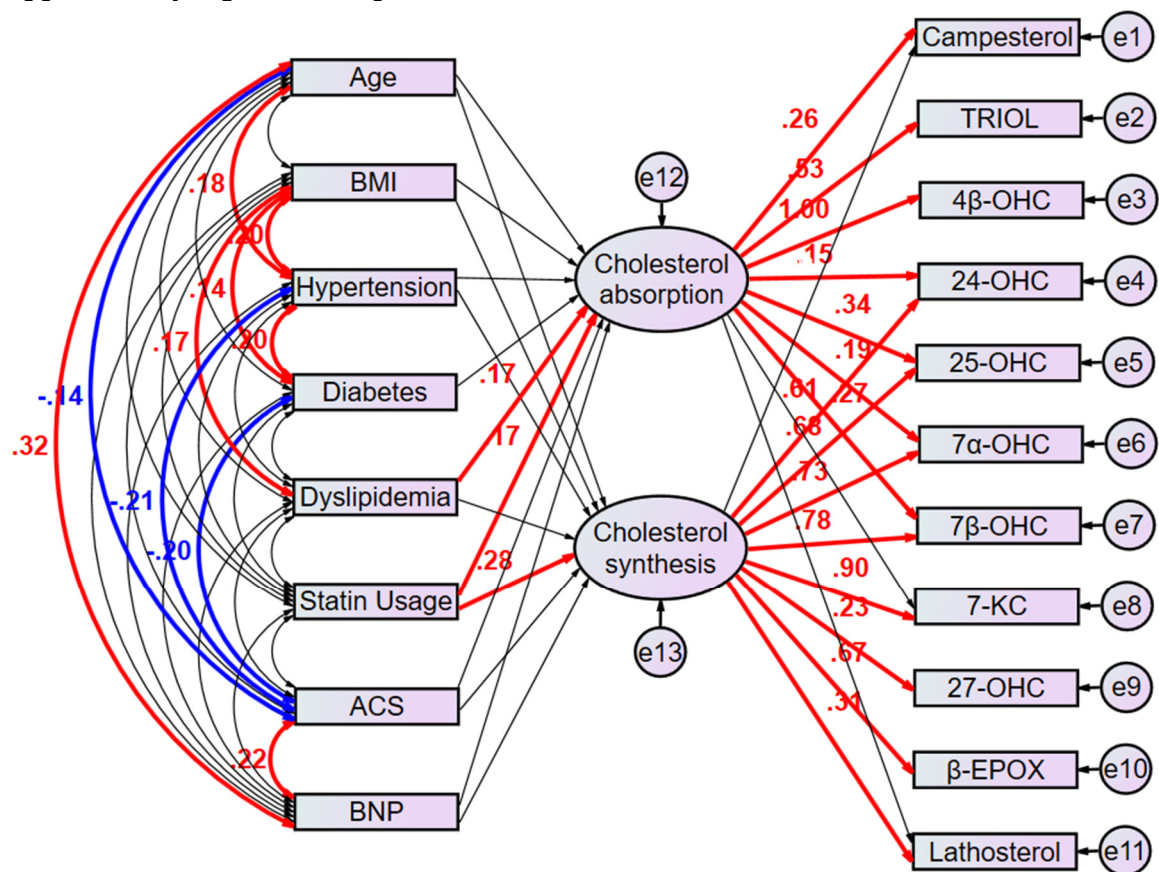

This path has a coefficient showing the standardized coefficient of regressing independent variables on the dependent variable of the relevant path. ACS=Acute coronary syndrome, BNP=brain natriuretic peptide, TRIOL=cholestan-3 $\beta$ ,5 $\alpha$ ,6 $\beta$ -triol, 4 $\beta$ -OH-C=4 $\beta$ -hydroxy-cholesterol, 24-OH-C=24-hydroxy-cholesterol, 7-keto-C=7-keto-cholesterol,  $\beta$ -epoxy-C= $\beta$ -epoxy-cholesterol.
